# Supplementary material
Source: PubMed Central journal article supplement (PMC4944412)
Supplement: supp_tpc.16.00125_TPC2016-00125-RAR2_Supplemental_Data_pdf.pdf [file supp_tpc.16.00125_TPC2016-00125-RAR2_Supplemental_Data_pdf.pdf]

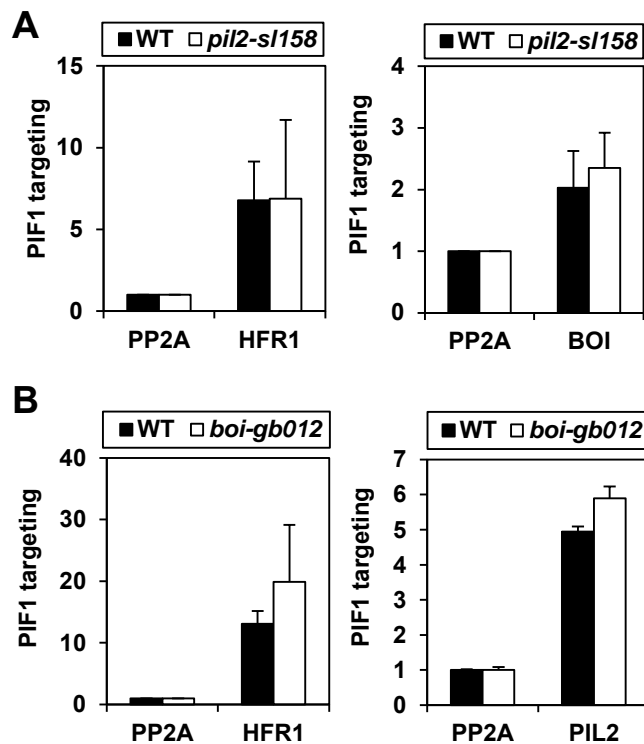

**Supplemental Figure 1.** T-DNA insertions do not affect PIF1 binding to independent loci.

(A) Similar enrichment of PBSs by PIF1 at both the *HFR1* and *BOI* loci in wild type (WT) and *pil2-sl158* seeds. This ChIP assay used an anti-PIF1 antibody on imbibed phyB<sub>off</sub> seeds. Error bars: SD (n=2 biological replicates)

(B) Similar enrichment of PBSs by PIF1 at both the *HFR1* and *PIL2* loci in WT and *boi-gb012* seeds. This ChIP assay used an anti-PIF1 antibody on imbibed phyB<sub>off</sub> seeds. Error bars: SD (n=2 biological replicates)

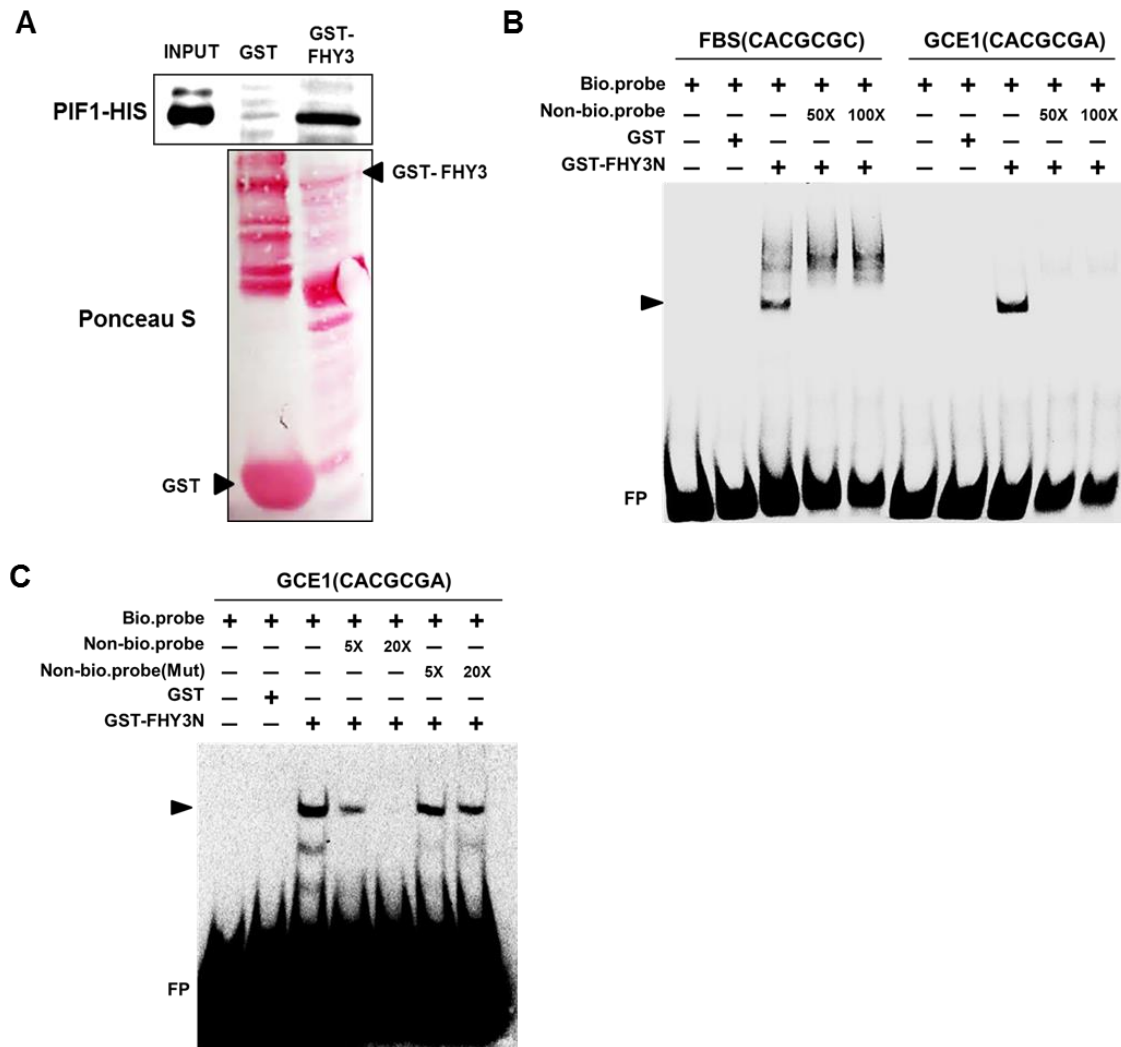

**Supplemental Figure 2.** FHY3 protein interacts with PIF1 and binds GCE1s.

(A) An *in vitro* binding assay demonstrates the interaction between FHY3 and PIF1. 6XHis-tagged PIF1 (PIF-HIS) is pulled-down by resin-bound GST or GST-FHY3 and detected with an anti-HIS antibody. Triangles indicate the GST or GST-FHY3 proteins.

(B and C) An EMSA showing the binding of FHY3 to the FHY3/FAR1 binding site (FBS) of the *FHY1* promoter and the GCE1 of the *At3g18080* promoter. Biotinylated and non-biotinylated double-stranded oligomers (Bio.probe and Non-bio.probe) were used for this assay. The Non-bio.probes were added at much higher concentrations (5x, 20x, 50x or 100x) than the Bio.probes. Non-bio.probe(Mut) indicates the addition of mutated non-biotinylated double-stranded oligomers at 5x or 20x the concentration of the Bio.probes. Triangles indicate the bands shifted by FHY3. FP indicates free, unbound DNA probes. This experiment used the N-terminal 200 amino acids of FHY3.

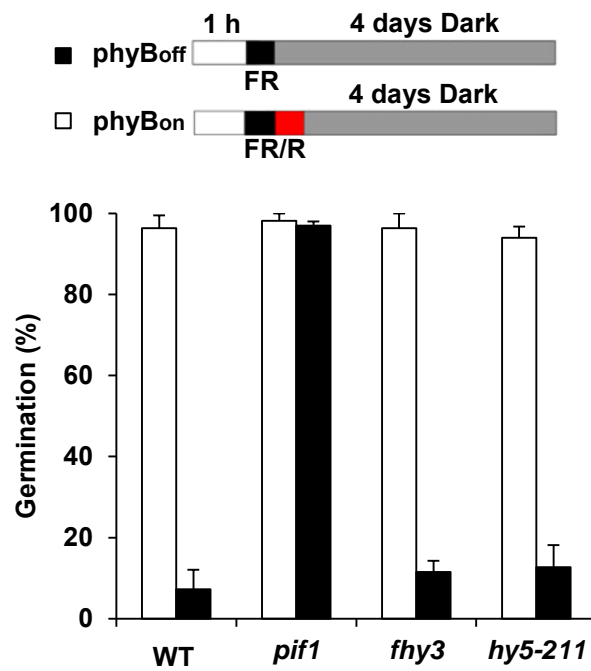

**Supplemental Figure 3.** *pif1* mutant but not *fhy3* and *hy5* mutant seeds germinate in the phyB<sub>off</sub> condition. The upper diagram indicates the light treatment schemes for the phyB<sub>on</sub> and phyB<sub>off</sub> conditions. The lower graph indicates germination frequency of each mutant in different light conditions.

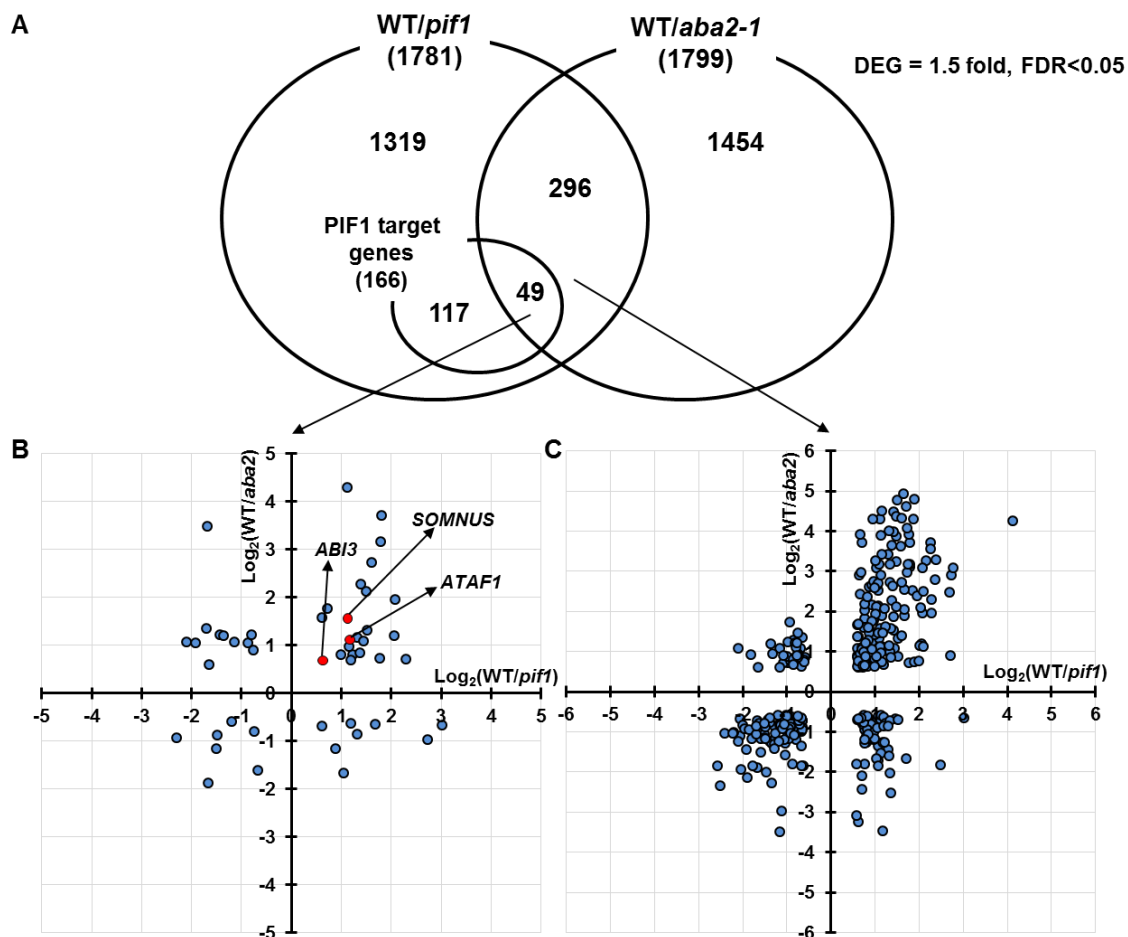

**Supplemental Figure 4.** PIF1 and ABA co-regulate a subset of genes in imbibed seeds.

(A) A Venn diagram indicating 345 overlapping differentially expressed genes (DEGs) between *WT/pif1* and *WT/aba2-1*. *WT/pif1* indicates *pif1* transcriptome data (fully dry, 12 hours, dark, GSE14374) and *WT/aba2* indicates *aba2* transcriptome data (freshly harvested, 24 hours, white light, GSE15700). The number of overlapping DEGs in the *pif1* and the *aba2* transcriptomes is statistically significant (hypergeometry test,  $P = 1.226 \times 10^{-29}$ ). These overlapping DEGs also overlap significantly with PIF1 target genes (hypergeometry test,  $P = 1.59 \times 10^{-24}$ ).

(B and C) Dot plots comparing the log<sub>2</sub>-transformed expression levels of the indicated genes, which fall preferentially in quadrants 1 and 3 (proportion test,  $P < 0.005$ ). Red dots indicate genes already known to inhibit seed germination.

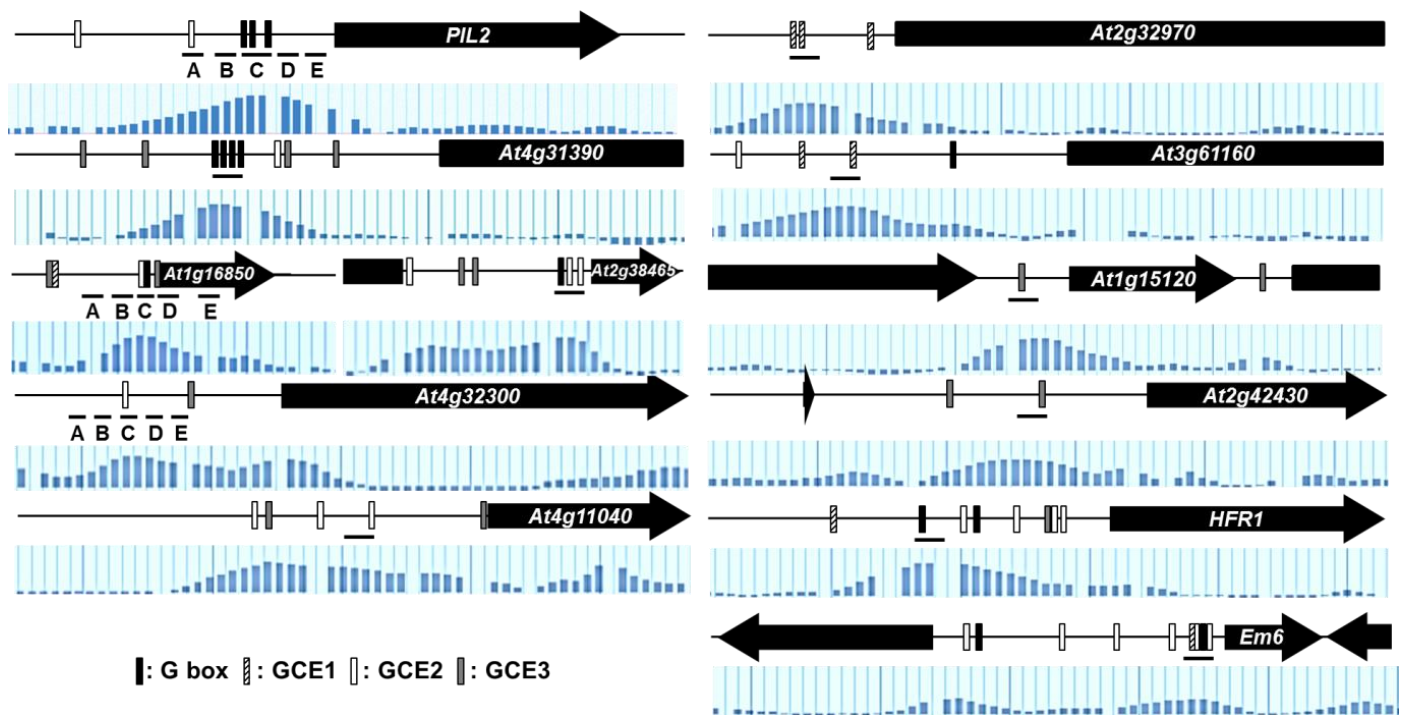

**Supplemental Figure 5.** Diagrams showing various loci (upper panels), PIF1 binding signals from ChIP-chip assays (lower panels), PBS sequence elements, and ChIP-PCR amplicons. Vertical bars in the lower panels indicate PIF1 binding intensities for given sites in previously reported ChIP-chip assays. A, B, C, D, and E indicate ChIP amplicons. 'C' amplicons were used for *PIL2*, *At1g16850*, *At4g32300* enrichments in Figure 4B.

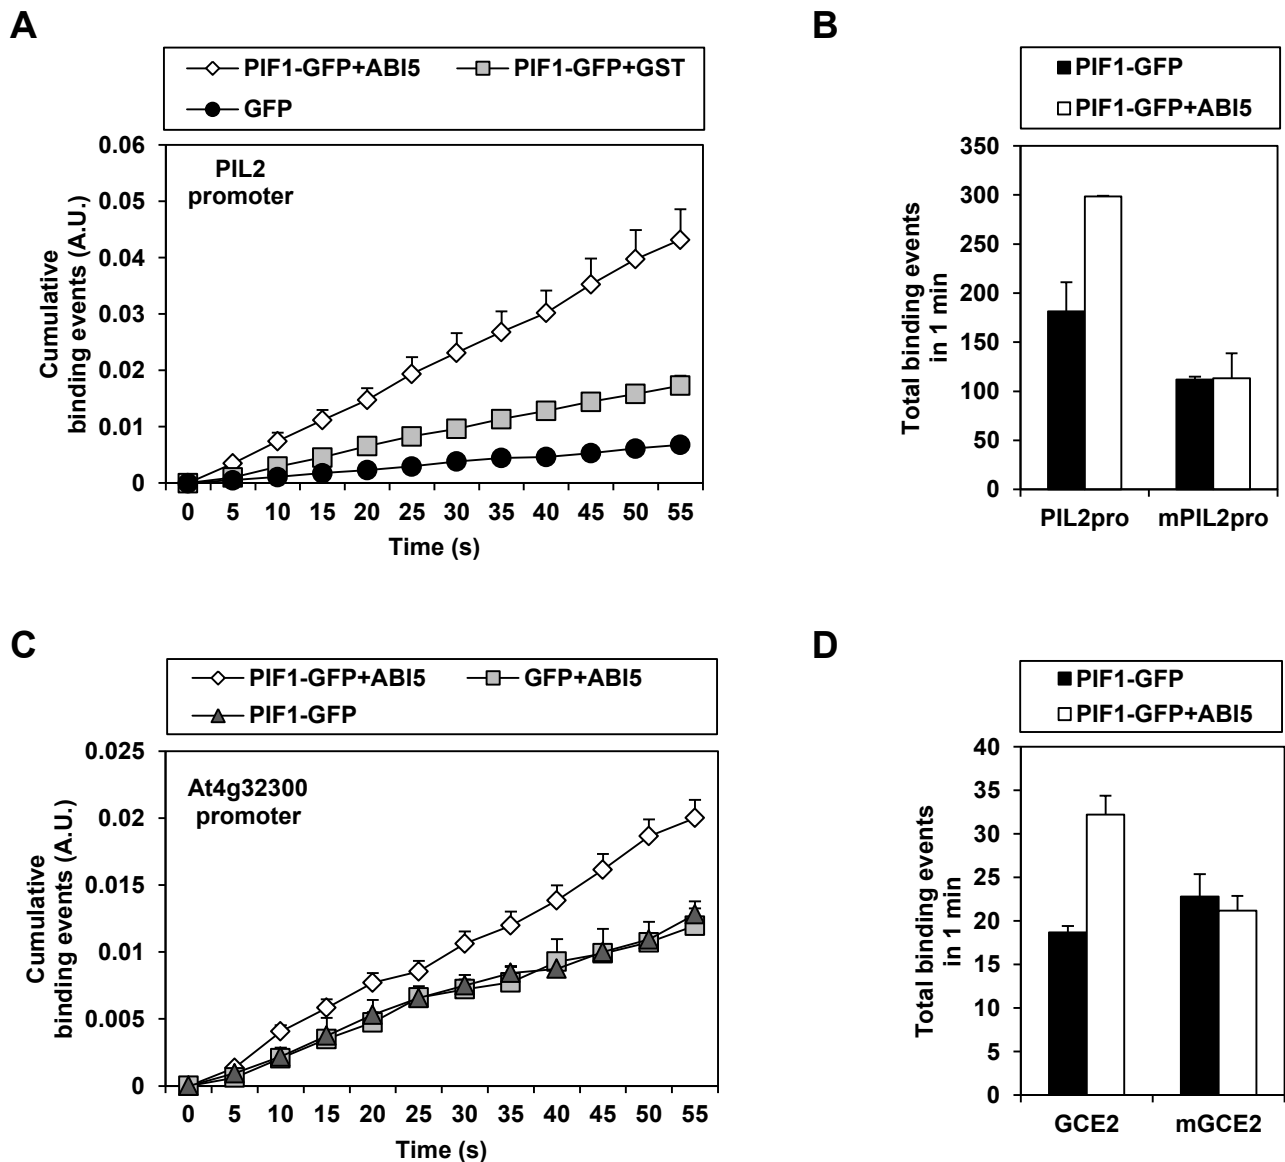

**Supplemental Figure 6.** ABI5 enhances PIF1 binding to PBSs – an experimental dataset distinct from that shown in Figure 7

(A) Real-time single molecule fluorescence imaging analysis shows that ABI5 enhances PIF1 binding to a *PIL2* promoter fragment containing three G-boxes. Promoter fragments are immobilized on a slide and binding events are detected by TIR fluorescence microscopy (TIRF) as GFP molecules approach the surface. Error bars: SEM (n=3 locations).

(B) The enhancement of PIF1 binding to the *PIL2* promoter fragment by ABI5 requires intact G-boxes. PIL2pro indicates immobilized *PIL2* promoter fragments containing three intact G-boxes, while mPIL2pro indicates the same fragment with three mutated G-boxes. Error bars: SEM (n=3 locations).

(C) ABI5 enhances PIF1 binding to an *At4g32300* promoter fragment containing a GCE2. Error bars: SEM (n=3 locations).

(D) The enhancement of PIF1 binding to the *At4g32300* promoter fragment by ABI5 requires an intact GCE2. GCE2 indicates immobilized promoter fragments containing an intact GCE2, while mGCE2 indicates the same fragments with a mutated GCE2. Error bars: SEM (n=20 locations).

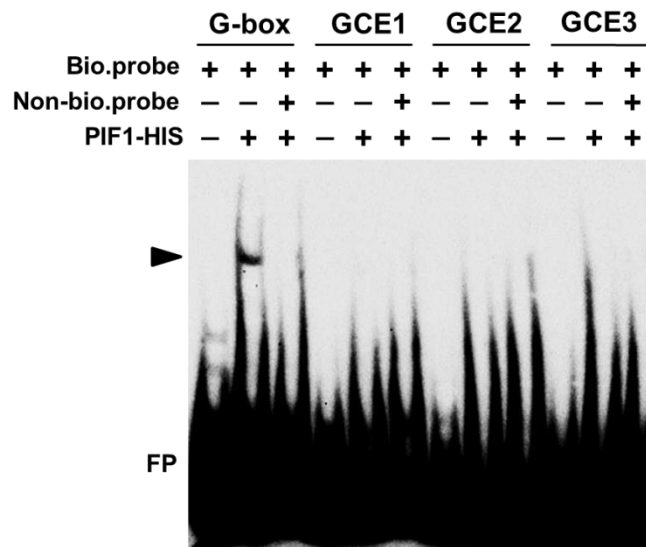

**Supplemental Figure 7.** PIF1 binds G-boxes but not GCEs *in vitro*. EMSA assay demonstrating PIF1 binding to G-boxes but not GCEs. PIF1-HIS and biotinylated double-stranded oligomers (Bio.probe) were used for this assay. Non-biotinylated double-stranded oligomers (Non-bio.probe) were used at 100x the concentration of the Bio.probes. The triangle indicates a shifted band. FP indicates free, unbound DNA probes. The probe sequence sources are as follows: G-box, the *PIL2* promoter; GCE1, the *At3g18080* promoter; GCE2, the *At1g16850* promoter; GCE3, the *At1g17830* promoter.

**Supplemental Table 1.** Classification of PIF1 target genes based on GCEs and expressional direction.

| <b>Expression</b> | <b>Total PIF1 target genes</b> | <b>G-box-containing</b> | <b>GCE1-containing</b> | <b>GCE2-containing</b> | <b>GCE3-containing</b> |
|-------------------|--------------------------------|-------------------------|------------------------|------------------------|------------------------|
| Activated         | 105                            | 71                      | 41                     | 69                     | 44                     |
| Repressed         | 61                             | 34                      | 22                     | 31                     | 27                     |
| <i>*P-value</i>   |                                | 0.1726                  | 0.8291                 | 0.08435                | 0.894                  |

\* The proportion of Activated and Repressed genes of total PIF1 target genes is compared with those of each GCE-containing target (proportion test).



**Supplemental Table 2.** List of primers

| Locus                      | Primer name | Primer sequences                                                               | Purpose |
|----------------------------|-------------|--------------------------------------------------------------------------------|---------|
| <i>PP2A</i><br>(At1g13320) | PP2A        | Forward : CTGGCGTGTGCGTTATATG<br>Reverse : CAAACATGGACTTCCAAGTACC              | ChIP    |
| <i>PIL2</i><br>(At3g62090) | P0          | Forward : GGTTATGTATAGTATCGATTGCCC<br>Reverse : AAGATTGCCCTCCTAGTCCTAG         |         |
|                            | A           | Forward : GAGGTTTCGTTTCGTGCCTTTTAGA<br>Reverse : ATCGGCACAAGGGCAAATCA AATG     |         |
|                            | B(P1)       | Forward : CTGAATCATTGTTGGTGTAAACCGGCT<br>Reverse : GTACCCGTATGCAGTGTATTAGAC    |         |
|                            | C           | Forward : ACATTGAATCACGTGGCTTTCACG<br>Reverse : GTGTTGGGGAGGAGAGAGAGAGAGAG     |         |
|                            | D(P2)       | Forward : GTCGTAATCGGTTTGTGAAACA<br>Reverse : TTAAATGCAAGGGATGTCGTTTCC         |         |
|                            | E           | Forward : TCTCAAAGATGCTAAGATTCGACT<br>Reverse : TCTTCAGTGGAAAGTAAGTGAAAGCT     |         |
| <i>BOI</i><br>(At4g19700)  | B0          | Forward : GATCGATATTACAAAGCACCCG<br>Reverse : TTACGGGTCTAGTCACTCTAGC           |         |
|                            | B3          | Forward : TGTCTCAACGACATTTTCAGTTC<br>Reverse : TAACTCGTGAATTCACACATCGT         |         |
|                            | B5          | Forward : GACCAGACGACAATTCAAGA AGCA<br>Reverse : GAGGCCACGTCTAAGTGGGACCAA      |         |
| At4g31390                  | At4g31390   | Forward : ATAAAATGATGGGCGCACGTGACA<br>Reverse : AGGAAGTGACGAAGTGGGGGTAAT       |         |
| At1g16850                  | A           | Forward : ATAAGCACAA ACGTGGTTACCTGT<br>Reverse : CATCTCAAGAGACGTATATACTGTG     |         |
|                            | B           | Forward : CCTAATGGTTACGTTGCAGTACCG<br>Reverse : GTGGCAGGTGGCTCATGAAACACC       |         |
|                            | C           | Forward : TCATTCACGTCCGGTCATTTTGTCTG<br>Reverse : GAAGCGAGTCCGGCAGCGAAA        |         |
|                            | D           | Forward : TGCCGACTCGCTTCGCTTTGCAAA<br>Reverse : CACCGCTCTCTCAGAATCGACATC       |         |
|                            | E           | Forward : CCCACTTCTTTCCTCCGAACACAT<br>Reverse : CGTCGCCGCCTCTTTCATATTTTC       |         |
| At2g38465                  | At2g38465   | Forward : AGCAACTCTTGCCACGTCTGTTTT<br>Reverse : TGGTATGGTTCTTACGTGGAACC        |         |
| At4g32300                  | A           | Forward : AGCATACCCCTCCAATAAGAACC<br>Reverse : TCTTTAGCTTTCAGCTCTTCCCTC        |         |
|                            | B           | Forward : AAGAGCTGAATCTTATAAGAAATTAGCA<br>Reverse : CAACGGCCAACGTTATTAACACAA   |         |
|                            | C           | Forward : AAAAGTCAAACCAAACCCACACGT<br>Reverse : GTGGGGAAGTGTGAAAGAAAGAGG       |         |
|                            | D           | Forward : CTCCTTAATCTCTATTTTCAAGTGCC<br>Reverse : GATTC AATACAGA ACTGCTTCTCCTC |         |
|                            | E           | Forward : CCGTCAAAGTAGACACAATACCAA<br>Reverse : AGAGGAATACCAATTGAAGCATCC       |         |
| At4g11040                  | At4g11040   | Forward : GTTGATCACTATCCCTGCTCATAT<br>Reverse : CGTCTGTTACATAACTCTTG CATG      |         |
| At2g32970                  | At2g32970   | Forward : GCCAGGGTCTCGTCCGTTTTTAAAT<br>Reverse : GTTTGCGGCTTTTCAGAAGACATC      |         |
| At3g61160                  | At3g61160   | Forward : GTCATATGAATCTTGTCGCGTGTG<br>Reverse : CACAAGCCAG AAAAAGCTCA AGGG     |         |

**Supplemental Table 2.** (Continued)

|                            |                        |                                                                            |         |
|----------------------------|------------------------|----------------------------------------------------------------------------|---------|
| At1g15120                  | At1g15120              | Forward : CTGCCATTA ACTCCATTACCACCA<br>Reverse : GATACCATGTGACATGTTGTTGGG  | ChIP    |
| At2g42430                  | At2g42430              | Forward : GAAGTCTCATGTTGCAGTCTCCAT<br>Reverse : ATCTACTGAGATTCTGGTTCTTAC   |         |
| <i>EM6</i><br>(At2g40170)  | EM6                    | Forward : ACACGCGGCGAAGAAGTACGGCCA<br>Reverse : ACGAAGAAGACTATAGTAGCTCGC   |         |
| <i>HFR1</i><br>(At1g02340) | HFR1                   | Forward : TACCCAAGTGTCAGACATAGCACC<br>Reverse : ACTTTGTAGCGTTGAATCAAATGG   |         |
| <i>PP2A</i>                | PP2A                   | Forward : TATCGGATGACGATTCTTCG GCAG<br>Reverse : GCTTGGTCGACTATCGGAATGAGAG | qRT-PCR |
| <i>PIL2</i>                | PIL2                   | Forward : CCGTGGTTGCTGATAGGTCGTTCC<br>Reverse : CGCTTCTGCATTTTCGTTTTCTTTTG |         |
| <i>BOI</i>                 | BOI                    | Forward : GTAAACGGTGCGGTGAGAGAGAAG<br>Reverse : TGACCATATCGCAAACCGGACAAG   |         |
| <i>ABI5</i><br>(At2g36270) | ABI5                   | Forward : GGTTAGAGAACATCCACTAATCC<br>Reverse : TTAGCCCTCCCATATCTACTCCAT    |         |
| <i>PIL2</i>                | G box                  | TCTTCCCACAACCACGTGGGCTTTTTGGCC                                             | EMSA    |
| At3g18080                  | GCE1                   | CGCTTTACGATTTCGCGTGATGACTTTTTCT                                            |         |
| At3g18080<br>(Mut)         | Non-bio.probe<br>(Mut) | CGCTTTACGATTCAAAGATGACTTTTTCT                                              |         |
| At1g16850                  | GCE2                   | GCCACCTCATTACGTCGGTCATTTTGTCG                                              |         |
| At1g17830                  | GCE3                   | CAGCTTCGACGACATGTGGAGACCAGATTA                                             |         |
| <i>FHY1</i><br>(At2g37678) | FBS                    | GTAGACTCTTTTCACGCGCCAAATCAAACA C                                           |         |
| <i>PIL2</i>                | PIL2                   | CCGGTCTAGATGGTCGGACACCAAATATTA TAG                                         | Imaging |
| At4g32300                  | At4g32300              | GAAGATTTACACATAAAAGTCAAACCAAACCCAC<br>ACGTCGGTCGTGAAAA AGC                 |         |
|                            | Mut                    | GAAGATTTACACATAAAAGTCAAACCAAACCCAC<br>TTTTCGGTCGTGAAAA AGC                 |         |
